# Supplementary material for: The new general biological property of stem-like tumor cells Part I. Peculiarities of the process of the double-stranded DNA fragments internalization into stem-like tumor cells
Source: Front Genet. 2022 Sep 8;13:954395. doi: 10.3389/fgene.2022.954395 (PMC9492886; doi:10.3389/fgene.2022.954395)
Supplement: Supplementary file 3 [file Table1.XLSX]

## Sheet: EBV+ B-lymphoma RNA-seq data
			Supplementary Material 2			Legend:
	RNA-seq			Real-time PCR		Highlighted in green: genes encoding proteoglycans/glycoproteins (PGs/GPs), scavenger receptors (SRs), glycosylphosphatidylinositol-associated proteins (GPI-APs), which apparently involved in the process of dsDNA binding/internalization
Gene	TAMRA+ *	The ratio of normalized unique reads in TAMRA+/TAMRA-	Description	Expression in TAMRA+ cells relative TAMRA– cells	Involvement in the processes	Highlighted in red: basic genes responsible for the "stem-like" and "cancer" properties of cells. Overexpression of these genes is characteristic of tumor stem-like cells
SELL	1973.24	7.89297	L-selectin; Cell surface adhesion protein. Mediates the adherence of lymphocytes to endothelial cells of high endothelial venules in peripheral lymph nodes. Promotes initial tethering and rolling of leukocytes in endothelia; C-type lectin domain containing	1,59±1,21	dsDNA binding and/or internalization	* Normalized number of aligned reads unique for the gene
HIP1R	861.95	2.67686	Enables several functions, including phosphatidylinositol phosphate binding activity; phosphatidylinositol-3,4-bisphosphate binding activity; and protein homodimerization activity. Involved in several processes, including positive regulation of signal transduction; protein stabilization; and regulation of organelle organization. Located in clathrin-coated vesicle; cytosol; and ruffle membrane			** No reads aligned in TAMRA- cells
ITGA5	621.206	5.54648	Integrin alpha-5; Integrin alpha-5/beta-1 is a receptor for fibronectin and fibrinogen. It recognizes the sequence R-G-D in its ligands. ITGA5:ITGB1 binds to PLA2G2A via a site (site 2) which is distinct from the classical ligand-binding site (site 1) and this induces integrin conformational changes and enhanced ligand binding to site 1. ITGA5:ITGB1 acts as a receptor for fibrillin-1 (FBN1) and m…
FCRL3	260.09	11.8223	Fc receptor-like protein 3; Promotes TLR9-induced B-cell proliferation, activation and survival but inhibits antibody production and suppresses plasma cell differentiation. Enhances activation of NF-kappa-B and MAPK signaling pathways in TLR9 stimulated B-cells. Has inhibitory potentional on B-cell receptor (BCR)-mediated signaling, possibly through association with SH2 domain-containing phosphat…
COL5A3	251.492		Collagen alpha-3(V) chain; Type V collagen is a member of group I collagen (fibrillar forming collagen). It is a minor connective tissue component of nearly ubiquitous distribution. Type V collagen binds to DNA, heparan sulfate, thrombospondin, heparin, and insulin
CDH17	245.043	61.2608	Cadherin-17; Cadherins are calcium-dependent cell adhesion proteins. They preferentially interact with themselves in a homophilic manner in connecting cells; cadherins may thus contribute to the sorting of heterogeneous cell types. LI-cadherin may have a role in the morphological organization of liver and intestine. Involved in intestinal peptide transport	0,67±0,40
NRP2	223.548	11.1774	Neuropilin-2; High affinity receptor for semaphorins 3C, 3F, VEGF-165 and VEGF-145 isoforms of VEGF, and the PLGF-2 isoform of PGF
TSPAN15	221.399	5.53496	Tetraspanin-15; Regulates maturation and trafficking of the transmembrane metalloprotease ADAM10. Promotes ADAM10-mediated cleavage of CDH2. Negatively regulates ligand-induced Notch activity probably by regulating ADAM10 activity; Belongs to the tetraspanin (TM4SF) family
IGF1R	199.904	24.9879	Insulin-like growth factor 1 receptor; Receptor tyrosine kinase which mediates actions of insulin-like growth factor 1 (IGF1). Binds IGF1 with high affinity and IGF2 and insulin (INS) with a lower affinity.
VCAM1	184.857	7.70238	Vascular cell adhesion protein 1; Important in cell-cell recognition. Appears to function in leukocyte-endothelial cell adhesion. Interacts with integrin alpha-4/beta-1 (ITGA4/ITGB1) on leukocytes, and mediates both adhesion and signal transduction. The VCAM1/ITGA4/ITGB1 interaction may play a pathophysiologic role both in immune responses and in leukocyte emigration to sites of inflammation; C2-…	6,65±4,39
COL4A6	161.213	8.06063	Collagen alpha-6(IV) chain; Type IV collagen is the major structural component of glomerular basement membranes (GBM), forming a ’chicken-wire’ meshwork together with laminins, proteoglycans and entactin/nidogen
COL4A5	150.465	12.5388	Collagen alpha-5(IV) chain; Type IV collagen is the major structural component of glomerular basement membranes (GBM), forming a ’chicken-wire’ meshwork together with laminins, proteoglycans and entactin/nidogen; Collagens	12,05±3,62
COL5A2	111.774	11.1774	Collagen alpha-2(V) chain; Type V collagen is a member of group I collagen (fibrillar forming collagen). It is a minor connective tissue component of nearly ubiquitous distribution. Type V collagen binds to DNA, heparan sulfate, thrombospondin, heparin, and insulin. Type V collagen is a key determinant in the assembly of tissue- specific matrices (By similarity)
PLAUR	105.326	3.29142	Encodes the receptor for urokinase plasminogen activator and, given its role in localizing and promoting plasmin formation, likely influences many normal and pathological processes related to cell-surface plasminogen activation and localized degradation of the extracellular matrix. It binds both the proprotein and mature forms of urokinase plasminogen activator and permits the activation of the r…
KCNH2	90.279	6.4485	Potassium voltage-gated channel subfamily H member 2; Pore-forming (alpha) subunit of voltage-gated inwardly rectifying potassium channel. Channel properties are modulated by cAMP and subunit assembly. Mediates the rapidly activating component of the delayed rectifying potassium current in heart (IKr)
COL7A1	88.1295	2.44804	The COL7A1 gene encodes the alpha-1 chain of type VII collagen. Collagen VII is the main constituent of anchoring fibrils.
FGFRL1	73.083	3.04513	Among its related pathways are mTOR Signaling and MAPK Signaling: Mitogens. Gene Ontology (GO) annotations related to this gene include heparin binding and fibroblast growth factor-activated receptor activity.
CDH11	68.784	34.392	Cadherin-11; Cadherins are calcium-dependent cell adhesion proteins. They preferentially interact with themselves in a homophilic manner in connecting cells; cadherins may thus contribute to the sorting of heterogeneous cell types	7,11±3,79
MEGF6	62.3355	10.3893	Multiple epidermal growth factor-like domains protein 6; Multiple EGF like domains 6	17,53±3,74
SCART1	62.3355	2.59731	Predicted to enable scavenger receptor activity. Predicted to be involved in endocytosis. Located in brush border and cytoplasm.	7,49±2,08
COL6A1	58.0365		Collagen alpha-1(VI) chain; Collagen VI acts as a cell-binding protein; Belongs to the type VI collagen family
GDPD5	51.588	2.34491
TENM4	49.4385	24.7193	Teneurin-4; Involved in neural development, regulating the establishment of proper connectivity within the nervous system. Plays a role in the establishment of the anterior-posterior axis during gastrulation. Regulates the differentiation and cellular process formation of oligodendrocytes and myelination of small- diameter axons in the central nervous system (CNS). Promotes activation of focal ad…
CAV1	47.289	11.8223	Caveolin-1; May act as a scaffolding protein within caveolar membranes. Interacts directly with G-protein alpha subunits and can functionally regulate their activity (By similarity). Involved in the costimulatory signal essential for T-cell receptor (TCR)- mediated T-cell activation. Its binding to DPP4 induces T-cell proliferation and NF-kappa-B activation in a T-cell receptor/CD3- dependent man…
COL22A1	47.289	7.8815	Collagen alpha-1(XXII) chain; Acts as a cell adhesion ligand for skin epithelial cells and fibroblasts; Belongs to the fibril-associated collagens with interrupted helices (FACIT) family
PCDH15	45.1395		Protocadherin-15; Calcium-dependent cell-adhesion protein. Essential for maintenance of normal retinal and cochlear function; Cadherin related
PODXL	40.8405	10.2101	Podocalyxin; Involved in the regulation of both adhesion and cell morphology and cancer progression. Function as an anti-adhesive molecule that maintains an open filtration pathway between neighboring foot processes in the podocyte by charge repulsion. Acts as a pro-adhesive molecule, enhancing the adherence of cells to immobilized ligands, increasing the rate of migration and cell- cell contacts…
PTPRM	40.8405	10.2101	Receptor-type tyrosine-protein phosphatase mu; Involved in cell-cell adhesion through homophilic interactions. May play a key role in signal transduction and growth control; Fibronectin type III domain containing
MMP24	30.093	7.52325	Matrix metalloproteinase-24; Metalloprotease that mediates cleavage of N-cadherin (CDH2) and acts as a regulator of neuro-immune interactions and neural stem cell quiescence. Involved in cell-cell interactions between nociceptive neurites and mast cells, possibly by mediating cleavage of CDH2, thereby acting as a mediator of peripheral thermal nociception and inflammatory hyperalgesia. Key regula…
COL9A3	27.9435	6.98588	Collagen alpha-3(IX) chain; Structural component of hyaline cartilage and vitreous of the eye; Collagen proteoglycans
SATB1	25.794	#ДЕЛ/0!**	DNA-binding protein SATB1; Crucial silencing factor contributing to the initiation of X inactivation mediated by Xist RNA that occurs during embryogenesis and in lymphoma (By similarity). Binds to DNA at special AT-rich sequences, the consensus SATB1-binding sequence (CSBS), at nuclear matrix- or scaffold-associated regions. Thought to recognize the sugar-phosphate structure of double-stranded DN…
SLC13A3	21.495	#DIV/0!	Solute carrier family 13 member 3; High-affinity sodium-dicarboxylate cotransporter that accepts a range of substrates with 4-5 carbon atoms. The stoichiometry is probably 3 Na(+) for 1 divalent succinate; Belongs to the SLC13A/DASS transporter (TC 2.A.47) family. NADC subfamily
RAB3A	19.3455	#DIV/0!	Ras-related protein Rab-3A; Involved in exocytosis by regulating a late step in synaptic vesicle fusion. Could play a role in neurotransmitter release by regulating membrane flow in the nerve terminal; RAB, member RAS oncogene GTPases
SYT6	19.3455	#DIV/0!	Synaptotagmin-6; May be involved in Ca(2+)-dependent exocytosis of secretory vesicles through Ca(2+) and phospholipid binding to the C2 domain or may serve as Ca(2+) sensors in the process of vesicular trafficking and exocytosis. May mediate Ca(2+)- regulation of exocytosis in acrosomal reaction in sperm (By similarity); Synaptotagmins
GPC2	17.196	2.866	GPC2 (Glypican 2). Among its related pathways are Metabolism and mTOR Signaling. Gene Ontology (GO) annotations related to this gene include heparan sulfate proteoglycan binding.
ACVR1	15.0465	#DIV/0!
KEL	15.0465	#DIV/0!
CD200R1	12.897	6.4485	Cell surface glycoprotein CD200 receptor 1; Inhibitory receptor for the CD200/OX2 cell surface glycoprotein. Limits inflammation by inhibiting the expression of proinflammatory molecules including TNF-alpha, interferons, and inducible nitric oxide synthase (iNOS) in response to selected stimuli. Also binds to HHV-8 K14 viral CD200 homolog with identical affinity and kinetics as the host CD200; Be…
CHODL	10.7475	#DIV/0!
KCNIP3	10.7475	#DIV/0!
SCARF2	10.7475	#DIV/0!	A scavenger receptor protein that mediates the binding and degradation of acetylated low density lipoprotein (Ac-LDL). This protein has only little activity of internalizing modified low density lipoproteins (LDL), but it can interact with SCARF1 through its extracellular domain. The association of this protein with SCARF1 is suppressed by the presence of scavenger ligands.	22,29±10,56
DENND1B	34.392	5.732	DENN domain-containing protein 1B; Guanine nucleotide exchange factor (GEF) for RAB35 that acts as a regulator of T-cell receptor (TCR) internalization in TH2 cells. Acts by promoting the exchange of GDP to GTP, converting inactive GDP-bound RAB35 into its active GTP-bound form. Plays a role in clathrin- mediated endocytosis. Controls cytokine production in TH2 lymphocytes by controlling the rate…
NSG1	27.9435		Neuronal vesicle trafficking-associated protein 1; Plays a role in the recycling mechanism in neurons of multiple receptors, including AMPAR, APP and L1CAM and acts at the level of early endosomes to promote sorting of receptors toward a recycling pathway. Regulates sorting and recycling of GRIA2 through interaction with GRIP1 and then contributes to the regulation of synaptic transmission and pl…
WNT5A	23.6	2.36	The protein produced from the WNT5A gene is part of chemical signaling pathways that control the movement of cells (cell migration) and attachment of cells to one another (cell adhesion) during early development.		Wnt signaling pathway (asymmetric division, maintenance of pluripotency)
WNT9B	4.3	#DIV/0!
WNT1	2.1	#DIV/0!
WNT5B	343.92	5.21091	WNT5B, a member of the WNT family of proteins that is closely related to WNT5A, is required for cell migration, cell proliferation, or cell differentiation in many cell types.
WNT2	174.1	12.4	Protein Wnt-2; Ligand for members of the frizzled family of seven transmembrane receptors. Probable developmental protein. May be a signaling molecule which affects the development of discrete regions of tissues. Is likely to signal over only few cell diameters; Belongs to the Wnt family
WNT10A	292.332	3.04513
LEF1	111.774	2.66129	This gene encodes a transcription factor belonging to a family of proteins that share homology with the high mobility group protein-1. The protein encoded by this gene can bind to a functionally important site in the T-cell receptor-alpha enhancer, thereby conferring maximal enhancer activity. This transcription factor is involved in the Wnt signaling pathway, and it may function in hair cell dif…
DLGAP1-AS5	51.588	2.1495	The long noncoding RNA (lncRNA). Oncogenic lncRNA in several cancers. Wnt1 was identified as the downstream target of DLGAP1-AS2. Furthermore, DLGAP1-AS2 was found to directly interact with the transcriptional repressor Six3, and this interaction hampered Six3 binding to the promoter regions of the Wnt1 gene, thereby leading to transcriptional activation of Wnt1.
ESRRB	36.5415	#DIV/0!	Steroid hormone receptor ERR2; Transcription factor that binds a canonical ESRRB recognition (ERRE) sequence 5’TCAAGGTCA-3’ localized on promoter and enhancer of targets genes regulating their expression or their transcriptional activity. Plays a role, in a LIF-independent manner, in maintainance of self-renewal and pluripotency of embryonic and trophoblast stem cells through different signaling …
NKD2	34.392	5.732	Protein naked cuticle homolog 2; Cell autonomous antagonist of the canonical Wnt signaling pathway. May activate a second Wnt signaling pathway that controls planar cell polarity (By similarity). Required for processing of TGFA and for targeting of TGFA to the basolateral membrane of polarized epithelial cells; EF-hand domain containing
FZD2	25.794	#DIV/0!	Frizzled-2; Receptor for Wnt proteins. Most of frizzled receptors are coupled to the beta-catenin canonical signaling pathway, which leads to the activation of disheveled proteins, inhibition of GSK- 3 kinase, nuclear accumulation of beta-catenin and activation of Wnt target genes. A second signaling pathway involving PKC and calcium fluxes has been seen for some family members, but it is not yet…
NLK	223.5	1.7	Positive effector of the non-canonical Wnt signaling pathway
CDK5R2	8.6	#DIV/0!	Enables cyclin-dependent protein serine/threonine kinase activator activity.
CDK3	98.9	#DIV/0!	Enables cyclin-dependent protein serine/threonine kinase activity
CDK2	932.9	1.5	Involved in positive regulation of cell population proliferation
LRP3	8.6	3.2	Positive regulation of osteoblast differentiation
TCF3	2979.2	1.5	Involved in gastrulation; positive regulation of neuron differentiation; and positive regulation of transcription by RNA polymerase II
RBP1	27.9	1.7	Enable all-trans-retinol binding activity and fatty acid binding activity		Retinol signaling system (maintenance of pluripotency)
PRC1	156.9	1.4	Polycomb group protein
BMI1	481.5	1.7
EED	659.9	1.1	Subunit of the PRC2 protein of the polycomb family
CLEC11A	19.3	#DIV/0!	C-type lectin domain family 11 member A; Promotes osteogenesis by stimulating the differentiation of mesenchymal progenitors into mature osteoblasts. Important for repair and maintenance of adult bone (By similarity); C-type lectin domain containing		Other factors of stem cells
FGFR1	141.9	1.8	The activated IGF1R is involved in cell growth and survival control. IGF1R is crucial for tumor transformation and survival of malignant cell. Ligand binding activates the receptor kinase, leading to receptor autophosphorylation, and tyrosines phosphorylation of multiple substrates, that function as signaling adapter proteins including, the insulin-receptor substrates (IRS1/2), Shc [...]
IFI27	23.6	#DIV/0!
CRABP2	6.4	#DIV/0!
ALDH1L1	8.6	1.4
CYP26A1	107.5	10.7	Cytochrome P450 26A1; Plays a key role in retinoic acid metabolism. Acts on retinoids, including all-trans-retinoic acid (RA) and its stereoisomer 9-cis-RA. Capable of both 4-hydroxylation and 18- hydroxylation. Responsible for generation of several hydroxylated forms of RA, including 4-OH-RA, 4-oxo-RA and 18-OH-RA; Belongs to the cytochrome P450 family
PIK3R3	221.4	2.4	Phosphatidylinositol 3-kinase (PI3K) phosphorylates phosphatidylinositol and similar compounds, which then serve as second messengers in growth signaling pathways. PI3K is composed of a catalytic and a regulatory subunit. The protein encoded by this gene represents a regulatory subunit of PI3K. The encoded protein contains two SH2 domains through which it binds activated protein tyrosine kinases …
CLEC18B	2.1	#DIV/0!	C-type lectin domain family 18 member B. Predicted to enable polysaccharide binding activity. Predicted to be located in Golgi apparatus; endosome; and sarcoplasmic reticulum. Predicted to be active in extracellular space. Expressed in some of cancer cells, which possibly indicates it associated with cancer.
IFI27L2	337.472	2.37656	Involved in apoptotic process. Located in mitochondrial membrane.
IGLL5	623.355	5.88071	Immunoglobulin lambda like polypeptide 5; C1-set domain containing
AFAP1L2	328.874	54.8123	Actin filament-associated protein 1-like 2; May play a role in a signaling cascade by enhancing the kinase activity of SRC. Contributes to SRC-regulated transcription activation; Pleckstrin homology domain containing
S100A13	40.8405	2.55253	The protein encoded by this gene is a member of the S100 family of proteins containing 2 EF-hand calcium-binding motifs. S100 proteins are localized in the cytoplasm and/or nucleus of a wide range of cells, and involved in the regulation of a number of cellular processes such as cell cycle progression and differentiation.
SRPK3	19.3455	2.41819	This gene encodes a protein kinase similar to a protein kinase which is specific for the SR (serine/arginine-rich domain) family of splicing factors. A highly similar protein has been shown to play a role in muscle development in mice.
LTBP1	10.7475	#DIV/0!	Latent transforming growth factor beta binding protein 1. The protein encoded by this gene belongs to the family of latent TGF-beta binding proteins (LTBPs). The secretion and activation of TGF-betas is regulated by their association with latency-associated proteins and with latent TGF-beta binding proteins. The product of this gene targets latent complexes of transforming growth factor beta to t…
IGF1	51.588	2.5794	Acts as a ligand for IGF1R. Binds to the alpha subunit of IGF1R, leading to the activation of the intrinsic tyrosine kinase activity which autophosphorylates tyrosine residues in the beta subunit thus initiatiating a cascade of down-stream signaling events leading to activation of the PI3K-AKT/PKB and the Ras-MAPK pathways. Binds to integrins ITGAV:ITGB3 and ITGA6:ITGB4. Its binding to integrins …
RASGRP2	262.239	4.37065	The protein encoded by this gene activate small GTPases, including RAS and RAP1/RAS3. The nucleotide exchange activity of this protein can be stimulated by calcium and diacylglycerol.
ARL4C	171.96	8.598	ADP-ribosylation factor-like protein 4C; Small GTP-binding protein which cycles between an inactive GDP-bound and an active GTP-bound form, and the rate of cycling is regulated by guanine nucleotide exchange factors (GEF) and GTPase-activating proteins (GAP). GTP-binding protein that does not act as an allosteric activator of the cholera toxin catalytic subunit. May be involved in transport betwe…
DLL4	34.392	8.598	Delta-like protein 4; Involved in the Notch signaling pathway as Notch ligand. Activates NOTCH1 and NOTCH4. Involved in angiogenesis; negatively regulates endothelial cell proliferation and migration and angiogenic sprouting. Essential for retinal progenitor proliferation. Required for suppressing rod fates in late retinal progenitors as well as for proper generation of other retinal cell types (…		Notch signaling pathway (asymmetric division, maintenance of pluripotency)
CACNG6	25.794	#DIV/0!	Voltage-dependent calcium channel gamma-6 subunit; Thought to stabilize the calcium channel in an inactivated (closed) state; Calcium channel auxiliary gamma subunits		Metabolism of Ca2+ (regulation of tumor cell growth and differentiation)
GPR15	128.97	2.1495	Class A orphan G protein-coupled receptor (heterotrimeric guanine nucleotide-binding protein, GPCR). This gene encodes a G protein-coupled receptor that acts as a chemokine receptor for human immunodeficiency virus type 1 and 2. The encoded protein localizes to the cell membrane. tumor-associated GPR15+ Tregs have a Th17-like phenotype, thereby producing IL17 and TNFα. Gpr15 deficiency repressed …		Immunity repression (escaping the attack of the immune cell system)
TNFRSF25	98.877	2.74658	The protein encoded by this gene is a member of the TNF-receptor superfamily. This receptor is expressed preferentially in the tissues enriched in lymphocytes, and it may play a role in regulating lymphocyte homeostasis. This receptor has been shown to stimulate NF-kappa B activity and regulate cell apoptosis. The signal transduction of this receptor is mediated by various death domain containing…
LGALS3BP	270.837	9.67275	Galectin-3-binding protein; Promotes integrin-mediated cell adhesion. May stimulate host defense against viruses and tumor cells; BTB domain containing		Epithelial-mesenchymal transition (remodeling of the cytoskeleton, factors altering the structure of the extracellular matrix in the cellular environment become expressed. A cell is thus able to cross the basal membrane and the endothelial wall, to move with the blood flow, to extravasate, and to form a new tumor nest)
PERP	189.156	2.19949	Involved in activation of cysteine-type endopeptidase activity. Predicted to be located in plasma membrane. Predicted to be active in cell-cell junction. Plays a role in stratified epithelial integrity and cell-cell adhesion by promoting desmosome assembly. Plays a role as an effector in the TP53-dependent apoptotic pathway.
TEKT4	139.718	9.97982	Tektin-4; Structural component of ciliary and flagellar microtubules. Forms filamentous polymers in the walls of ciliary and flagellar microtubules (By similarity). Predicted to be involved in cilium assembly and cilium movement involved in cell motility. TEKT4 downregulation suppressed cell proliferation, colony formation, cell migration, and invasion. Tumor-suppressing role of TEKT4 knockdown i…
MMP19	38.691	2.1495	Matrix metallopeptidase 19. This gene encodes a member of a family of proteins that are involved in the breakdown of extracellular matrix in normal physiological processes, such as embryonic development, reproduction, and tissue remodeling, as well as in disease processes, such as arthritis and metastasis. The encoded protein is secreted as an inactive proprotein, which is activated upon cleavage…
TTLL9	27.9435	4.65725	Predicted to be involved in microtubule cytoskeleton organization and protein polyglutamylation. Predicted to act upstream of or within flagellated sperm motility. Predicted to be located in ciliary basal body; cytoplasm; and microtubule.
MAP7	17.196	#DIV/0!	Ensconsin; Microtubule-stabilizing protein that may play an important role during reorganization of microtubules during polarization and differentiation of epithelial cells. Associates with microtubules in a dynamic manner. May play a role in the formation of intercellular contacts. Colocalization with TRPV4 results in the redistribution of TRPV4 toward the membrane and may link cytoskeletal micr…
ITGA10	12.897	#DIV/0!	Participate in cell adhesion as well as cell-surface mediated signalling. This gene encodes an integrin alpha chain and is expressed at high levels in chondrocytes, where it is transcriptionally regulated by AP-2epsilon and Ets-1. The protein encoded by this gene binds to collagen. High expression associated with the risk of metastasis and decreased survival.
UPK3B	12.897	6.4485	Uroplakin-3b; Component of the asymmetric unit membrane (AUM); a highly specialized biomembrane elaborated by terminally differentiated urothelial cells. May play an important role in AUM-cytoskeleton interaction in terminally differentiated urothelial cells. It also contributes to the formation of urothelial glycocalyx which may play an important role in preventing bacterial adherence (By simila…
MYO10	10.7475	#DIV/0!	This gene encodes a member of the myosin superfamily. The protein represents an unconventional myosin. This gene functions as an actin-based molecular motor and plays a role in integration of F-actin and microtubule cytoskeletons during meiosis. Knockdown/overexpression of MYO10 significantly inhibited/enhanced the proliferation, invasion, and migration capabilities of cervical cells.
SMAD1	227.847	10.3567	Mothers against decapentaplegic homolog 1; Transcriptional modulator activated by BMP (bone morphogenetic proteins) type 1 receptor kinase. SMAD1 is a receptor-regulated SMAD (R-SMAD). SMAD1/OAZ1/PSMB4 complex mediates the degradation of the CREBBP/EP300 repressor SNIP1. May act synergistically with SMAD4 and YY1 in bone morphogenetic protein (BMP)-mediated cardiac-specific gene expression; Belon…		Cell survival and apoptosis evasion
IFI27	23.6445	#DIV/0!	Interferon alpha-inducible protein 27, mitochondrial; Promotes cell death. Mediates IFN-induced apoptosis characterized by a rapid and robust release of cytochrome C from the mitochondria and activation of BAX and caspases 2, 3, 6, 8 and 9
IFI27L2	337.5	2.4
TNFRSF25	98.9	2.7
GPR160	25.794	#DIV/0!	Probable G-protein coupled receptor 160; Orphan receptor; G protein-coupled receptors, Class A orphans. Associated with apoptosis and cell cycle arrest of prostate cancer cells.
CCDC73	174.11	9.67275	Coiled-coil domain containing 73. Identified as drug resistance-related genes in lung cancer.		Drug resistance
PDE1C	96.7275	3.45455	Calmodulin-dependent cyclic nucleotide phosphodiesterase with a dual-specificity for the second messengers cAMP and cGMP, which are key regulators of many important physiological processes.		cAMP dependent signaling pathway (cell survival and apoptosis evasion, immediate early response to mitogens, cell differentiation and dedifferentiation, metabolism of lipids and carbohydrates)
ADCY5	19.3455	#DIV/0!	Adenylate cyclase type 5; Catalyzes the formation of the signaling molecule cAMP in response to G-protein signaling. Mediates signaling downstream of ADRB1. Regulates the increase of free cytosolic Ca(2+) in response to increased blood glucose levels and contributes to the regulation of Ca(2+)-dependent insulin secretion; Adenylate cyclases
ATP6V0D2	2.1	#DIV/0!
INCA1	6.4	#DIV/0!
NT5E	288	1.2
PDE4D	8.6	#DIV/0!
SRPK3	17.2	2.1
SEMG1	249.342	#DIV/0!	Semenogelin-1; Predominant protein in semen. It participates in the formation of a gel matrix entrapping the accessory gland secretions and ejaculated spermatozoa. Fragments of semenogelin and/or fragments of the related proteins may contribute to the activation of progressive sperm movements as the gel-forming proteins are fragmented by KLK3/PSA. SEMG1 and SEMG2 expression normally is restricted…		Genes that determine the "cancer" properties of cells
CDK3	98.877	3.53132	This gene encodes a member of the cyclin-dependent protein kinase family. The protein promotes entry into S phase, in part by activating members of the E2F family of transcription factors. The protein also associates with cyclin C and phosphorylates the retinoblastoma 1 protein to promote exit from G0. Overexpressed in a number of cancer cell lines, and may be important role in cell proliferation…
PDK4	4.3	#DIV/0!	Sugar and lipid metabolism
SLC2A4	2.1	#DIV/0!	Sugar and lipid metabolism
ZFR2	2.1	#DIV/0!
VPREB3	4.3	#DIV/0!
TTLL9	23.6	3.9	Cancer-related gene
CLDN23	64.485	3.22425	This gene encodes a member of the claudin family. Claudins are integral membrane proteins and components of tight junction strands. Tight junction strands serve as a physical barrier to prevent solutes and water from passing freely through the paracellular space between epithelial or endothelial cell sheets, and also play critical roles in maintaining cell polarity and signal transductions. This …
